## Incubation periods impact the spatial predictability of outbreaks: analysis of cholera and Ebola outbreaks in Sierra Leone

Rebecca Kahn<sup>1\*</sup>, rek160@mail.harvard.edu

Corey M. Peak<sup>1\*</sup>, peak@mail.harvard.edu

Juan Fernández-Gracia<sup>1</sup>, juanf@ifisc.uib-csic.es

Alexandra Hill<sup>2</sup>, Hilla@who.int

Amara Jambai<sup>3</sup>, amarajambai@yahoo.com

Louisa Ganda<sup>4</sup>, gandal@who.int

Marcia C. Castro,<sup>5</sup> mcastro@hsph.harvard.edu

Caroline O. Buckee,<sup>1±</sup> cbuckee@hsph.harvard.edu

<sup>1</sup> Center for Communicable Disease Dynamics, Department of Epidemiology, Harvard T.H. Chan School of Public Health, Boston, MA 02115

<sup>2</sup> World Health Organization, Geneva, Switzerland

<sup>3</sup> Ministry of Health and Sanitation, Freetown, Sierra Leone

<sup>4</sup> World Health Organization Country Office, Freetown, Sierra Leone

<sup>5</sup> Department of Global Health and Population, Harvard T.H. Chan School of Public Health, Boston, MA 02115

\*These authors contributed equally to this work

±To whom correspondence should be addressed

Major: Biological Sciences

Minor: Population Biology

1 **Abstract**

2 Forecasting the spatiotemporal spread of infectious diseases during an outbreak is an  
3 important component of epidemic response. However, it remains challenging both  
4 methodologically and with respect to data requirements as disease spread is influenced by  
5 numerous factors, including the pathogen's underlying transmission parameters and  
6 epidemiological dynamics, social networks and population connectivity, and environmental  
7 conditions. Here, using data from Sierra Leone we analyze the spatiotemporal dynamics of  
8 recent cholera and Ebola outbreaks and compare and contrast the spread of these two  
9 pathogens in the same population. We develop a simulation model of the spatial spread of an  
10 epidemic in order to examine the impact of a pathogen's incubation period on the dynamics of  
11 spread and the predictability of outbreaks. We find that differences in the incubation period  
12 alone can determine the limits of predictability for diseases with different natural history, both  
13 empirically and in our simulations. Our results show that diseases with longer incubation  
14 periods, such as Ebola, where infected individuals can travel further before becoming  
15 infectious, result in more long-distance sparking events and less predictable disease  
16 trajectories, as compared to the more predictable wave-like spread of diseases with shorter  
17 incubation periods, such as cholera.

18

19 Keywords: cholera, Ebola, epidemics, modeling, predictability, Sierra Leone

20

21

22

## 23 **Significance statement**

24 Understanding how infectious diseases spread is critical for preventing and containing  
25 outbreaks. While advances have been made in forecasting epidemics, much is still unknown.  
26 Here we show that the incubation period – the time between exposure to a pathogen and  
27 onset of symptoms – is an important factor in predicting spatiotemporal spread of disease and  
28 provides one explanation for the different trajectories of the recent Ebola and cholera  
29 outbreaks in Sierra Leone. We find that outbreaks of pathogens with longer incubation periods,  
30 such as Ebola, tend to have less predictable spread, whereas pathogens with shorter incubation  
31 periods, such as cholera, spread in a more predictable, wavelike pattern. These findings have  
32 implications for the scale and timing of reactive interventions, such as vaccination campaigns.

33

## 34 **Introduction**

35 Epidemics of emerging infectious diseases such as Ebola and Zika underscore the need  
36 to improve global capacity for surveillance and response (1–3). Forecasting the spatiotemporal  
37 spread of infectious diseases during an outbreak can enable responders to stay ahead of an  
38 epidemic, but it remains challenging both methodologically and with respect to data  
39 requirements. Disease spread is influenced by factors, including: the pathogen’s underlying  
40 transmission parameters and epidemiological dynamics; social networks and population  
41 connectivity; and environmental conditions (4–7). Previous forecasting efforts have had varying  
42 levels of success in predicting the total number of cases and spatiotemporal spread of  
43 outbreaks like Ebola, and few have actually been used in real time in the midst of an epidemic  
44 (5). Efforts to understand the likely performance of forecasts have shown that heterogeneity in

45 contact structure and number of secondary infections can pose challenges, but reasonable  
46 predictions can be made in some cases, depending on disease-specific parameters (4).  
47 However, the epidemiological attributes that determine predictability remain poorly defined in  
48 real-world settings.

49         The time taken for individuals to become infectious (the latent period) and symptomatic  
50 (the incubation period) following infection, and the relationship between the two, have been  
51 shown to play a large role in the epidemic potential of diseases (7–9). In particular, transmission  
52 that occurs during the incubation period before an individual develops symptoms can  
53 contribute to rapid disease spread. When the latent period is shorter than the incubation  
54 period for an infectious individual, pre-symptomatic transmission can be a strong driver of the  
55 total number of secondary infections by an infectious individual in a completely susceptible  
56 population (i.e.  $R_0$ ) (8, 9). Indeed, the basis of contact tracing protocols during an outbreak  
57 reflect the need to identify and contain individuals during the incubation period, and the  
58 relative effectiveness of interventions such as symptom monitoring or quarantine significantly  
59 depends on the relationship between infectiousness and symptoms (9). The incubation period  
60 is also likely to play a particularly important role in determining the spatial spread of an  
61 epidemic because one’s typical travel may continue prior to symptom onset, whereas travel  
62 behavior may change or stop altogether during illness (10), particularly when symptoms are  
63 severe or immobilizing.

64         Back-to-back epidemics of cholera (2012-2013) and Ebola (2014-2015) in Sierra Leone  
65 present a unique opportunity to compare the spatial dynamics of two epidemics in the same  
66 population caused by pathogens with notable similarities in both the drivers of outbreaks and

67 the interventions used to curtail them, including oral rehydration (11, 12). Both are transmitted  
68 through contact with contaminated diarrhea or vomitus (plus other bodily fluids for Ebola), and  
69 the reproductive number ( $R_0$ ) for both diseases is thought to be between 1 and 3 (13, 14). Both  
70 diseases can cause immobilizing gastrointestinal symptoms of diarrhea and vomiting and,  
71 untreated, their case fatality rates can exceed 50% (15, 16). Cultural factors and rituals, such as  
72 traditional funeral practices, are known to influence the spread of both cholera (17) and Ebola  
73 (18), while water, sanitation, and hygiene (WASH) programs are often used to slow the spread  
74 of each (19). Both epidemics occurred against a backdrop of an immunologically naïve  
75 population. Presumably, travel patterns and the density and distribution of people were  
76 broadly similar over the time period in question. One critical difference between the dynamics  
77 of these diseases, however, is the incubation period, which is estimated at a median of 8-12  
78 days between infection and onset of symptoms for Ebola (1) and only 1-2 days for cholera (20).

79 We hypothesize that the disease incubation period may be a particularly influential  
80 driver of different patterns of disease spread through space and time. We analyze the  
81 spatiotemporal dynamics of a cholera outbreak and an Ebola outbreak in Sierra Leone, both of  
82 which occurred over a similar time period. We develop a simulation model of the spatial spread  
83 of an epidemic and examine the impact of the incubation period on the dynamics of spread and  
84 the predictability of outbreaks. We find that differences in the incubation period alone can  
85 determine the limits of predictability for these diseases with different natural history, both  
86 empirically and in our simulations. Our results show that diseases with longer incubation  
87 periods, such as Ebola, where infected individuals can travel further before becoming  
88 infectious, result in more long-distance sparking events and less predictable disease

89 trajectories, as compared to the more predictable wave-like spread of diseases with shorter  
90 incubation periods, such as cholera.

91

## 92 **Results**

93 We first summarize the cholera and Ebola epidemics in terms of their dynamics in time  
94 and space. More cases were reported during the cholera epidemic (22,691) than during the  
95 Ebola epidemic (11,903); however, far fewer cholera cases were fatal (324 vs. 3,956). Both  
96 epidemics lasted for similar periods of time, with cholera (January 7, 2012 – May 14, 2013)  
97 occurring two years prior to Ebola (May 18, 2014 – September 12, 2015). The times between  
98 the onset of an outbreak and when half or all of its cases were reported were longer when  
99 outbreaks were aggregated by district instead of chiefdom (Figure 1), which has implications for  
100 the optimal scale for surveillance and response measures. The median time for a chiefdom  
101 cholera outbreak to report half its case total was 3.9 weeks, and median outbreak duration was  
102 11.3 weeks. The median time for district outbreaks to report half their cholera cases was 7.9  
103 weeks, and the median outbreak duration was 43.7 weeks. Analysis of Ebola revealed similar  
104 trends, with chiefdoms reporting half of their cases at a median of 13.9 weeks and median  
105 outbreak duration of 43.3 weeks, and districts reporting half of their cases at a median of 23.5  
106 weeks and median outbreak duration of 64.1 weeks.

107 Both the cholera and Ebola epidemics were widespread, each reaching more than 75%  
108 of the country's chiefdoms. However, their trajectories differed. The spread of cholera from the  
109 northwest followed a radial spatial dispersion gradually in all directions for the first six months,  
110 while Ebola spread from the southeast for two months before rapid expansion to the northwest

111 which sparked the national epidemic (Figure 2 A-B). These findings were statistically supported  
112 by space-time analysis of each epidemic, which revealed clusters of high case reporting of both  
113 diseases in western Sierra Leone and unique clusters of cholera in the south and Ebola in the  
114 east (Figure S1). The wave front of chiefdom cholera outbreak onset progressed more slowly  
115 and gradually than for Ebola, which exhibited faster and more discontinuous expansion as  
116 shown by the larger spacing between monthly contour lines (Figure 2 A-B). Despite their  
117 different trajectories, the geography of the epidemics largely overlapped, with clusters of high  
118 cumulative attack rates of cholera and Ebola observed in the north and west regions of Sierra  
119 Leone (Figures 2 C-D) and confirmed through Local Moran's I methods (Figure S2).

120 As a daily estimate of transmission intensity, we recorded the effective reproductive  
121 number ( $R_t$ ) and its variation over time nationally and by region (Figure 3). While some areas  
122 sustained transmission (i.e.,  $R_t > 1$ ) of both cholera and Ebola for many days (e.g., Freetown in  
123 the west and Kenema Town in the east), most chiefdoms recorded either zero cases or zero  
124 days with  $R_t > 1$  (Figure S3). As expected, transmission intensity of both diseases was positively  
125 correlated in chiefdoms near each other (Figure S4). Correlation decayed with distance,  
126 consistent with local disease spread, and inter-chiefdom distances of over 100km eliminated  
127 any evidence of positive correlation of disease presence, chiefdom outbreak time, case count,  
128 and cumulative attack rate (Figure S4). These metrics appear more highly correlated in space  
129 for cholera than for Ebola, although the confidence intervals overlap.

130

131 *Simulations*

132 Our simulations show a systematic relationship between the incubation period and  
133 spatiotemporal patterns of disease spread. As expected, simulated epidemic curves of diseases  
134 with shorter incubation periods were more acute while diseases with longer incubation periods  
135 peaked later (Figure 4A). Although epidemics tend to last longer for diseases with longer  
136 incubation periods, the spread of the disease to more distant locations can progress more  
137 quickly, causing a discontinuous and more rapidly spreading wave front (Figure 4 C-D). In the  
138 first 50 days of our simulations, locations further from the origin of the epidemic experienced  
139 cases earlier on average in simulations with longer incubation periods compared to those with  
140 shorter incubation periods, likely due to long-distance sparking events from infected agents  
141 traveling during the incubation period (Figure 4B). The dispersion kernel  $K^x(d)$ , the probability  
142 that an agent will end up at a position separated a distance  $d$  from the initial position after  $x$   
143 days, is more homogeneously spread and has non-vanishing probabilities at greater distances  
144 the higher the incubation period, explaining the enhancement in sparking events (Figure S5).

145 Simulations on a lattice with relative population size based on Sierra Leone's chiefdom  
146 census data support the finding that the duration of epidemics is longer on a district (i.e. group  
147 of lattice points) rather than chiefdom (i.e. individual lattice point) scale, with duration  
148 lengthening with increasing incubation periods (Figure 5A).

149 Consistent with the correlation analysis comparing Sierra Leone's cholera and Ebola  
150 outbreaks, time series from simulated outbreaks with shorter incubation periods were more  
151 highly correlated than those from simulations with longer incubation periods, with correlation  
152 decaying as distance between locations on the lattice increased (Figure 5 B-C). Higher  
153 correlation suggests increased predictability, which the results of the overlap function support



154 (Figure 6). As the incubation period lengthened, the average predictability during the beginning  
155 of the outbreak decreased as the epidemics spread via unpredictable sparking patterns.  
156 Predictability plateaued as the outbreaks became widespread.

157

## 158 **Discussion**

159 Analysis of the cholera and Ebola epidemics revealed commonalities and differences in  
160 the way these pathogens spread throughout Sierra Leone, and our simulations suggest the  
161 differences in the incubation period reproduce these differences. Spatial diffusion of Ebola  
162 occurred more quickly than cholera, as evidenced by the wave front contour lines and further  
163 supported by statistical tests considering a subset excluding cholera cases before the brief  
164 respite in June (Figure S6). Additionally, cholera metrics were more correlated in space than  
165 Ebola metrics. Our model simulations suggest that these findings are potentially due to the  
166 counter-intuitive role of the longer incubation period for Ebola as compared to cholera. Travel  
167 during the incubation period will be a key driver of geographic disease dispersion and  
168 predictability, especially in a population of individuals who decrease mobility when ill.  
169 Consequently, diseases with longer incubation periods will tend to have more long-distance  
170 sparking events caused by infected, but healthy, individuals traveling during the incubation  
171 period. This will result in faster epidemic dispersion to distant, unpredictable locations. These  
172 findings are in line with Marvel et al.'s results, which found epidemic wave fronts are less likely  
173 to occur for mobility kernels that decay more slowly (21); when the incubation period is longer,  
174 the effective kernel can span to more distant places, making sparking events more probable.

175            Similar results were also obtained when infectious agents did not decrease mobility  
176 when ill, suggesting that travel during the incubation period has more influence on correlation  
177 and predictability than travel during the infectious period. While many other factors will  
178 influence wave speed, continuity, and epidemic synchrony, our simulations showed that small  
179 changes in the incubation period can powerfully influence epidemic dynamics.

180            The incubation period has already been recognized as an important component for  
181 understanding epidemics and control (8), with the conventional knowledge that long incubation  
182 periods allow more time for responders to scale-up interventions against the overall epidemic  
183 and are therefore advantageous for disease control efforts. Here we demonstrated a counter-  
184 intuitive mechanism whereby a longer incubation period may in fact hinder a response by  
185 decreasing the predictability of outbreaks and increasing their geographic scope as well as of  
186 the needs of surveillance and response. We use simulations to reproduce the double-edged  
187 sword of the influence of the disease incubation period on reactive interventions.

188            Reactive vaccination strategies exist for both cholera and Ebola outbreaks, and a better  
189 understanding of spatiotemporal spread can facilitate locally-preemptive vaccination to target  
190 locations at high risk of introduction (22–24). Reactive vaccination campaigns must consider  
191 both the expected duration of an outbreak at a given spatial scale and the predictability of its  
192 spread. For cholera, we showed that chiefdom outbreaks tended to report half their cases  
193 within approximately 4 weeks, suggesting reactive vaccination of a chiefdom triggered by  
194 detection of a case may not be early enough to avert an outbreak and instead intervening at a  
195 wider scale, such as districts, might provide more favorable timing for intervention targeting.  
196 We posit for future study that regional-ring vaccination strategies may be better suited to

197 diseases with short incubation periods, while contact-ring vaccination strategies may be better  
198 suited to diseases with longer incubation periods due to their regional unpredictability and the  
199 longer intervals between generations in infection.

200         There are limitations to our work with regards to data as well as methods. Few cholera  
201 cases were confirmed during the epidemic and therefore we depend on the clinical definition as  
202 well as the cases that were detected and recorded by the surveillance system. Ebola  
203 surveillance data is similarly prone to differences in reporting rates, but the use of only  
204 confirmed cases yielded similar results. Our estimates for the effective reproductive number  
205 depend on, and absorb the limitations of, case data, serial interval estimates, and the chiefdom  
206 connectivity matrix. Specifically, we assume all cases in our dataset acquired infection from  
207 others in the dataset, thereby excluding missing cases and asymptomatic transmitters.  
208 However, this method has been shown to be robust to cases missing at random and we  
209 furthermore expect the role of asymptomatic transmission to be limited for both diseases due  
210 to the strong correlation between pathogen load, symptoms, and infectiousness (25, 26).

211         Further, we assume no changes to the serial interval for either cholera or Ebola during  
212 the course of the epidemics. For cholera specifically, waterborne transmission could potentially  
213 lead to a heavy right-tail in serial intervals or change the distribution as pathogen accumulates  
214 or clears from a drinking source. Household data in Bangladesh, where the role of water  
215 contamination is expected to be large, suggest few serial intervals beyond 7 days (27). The  
216 geographic spread of cholera in Sierra Leone from the northwest and south towards the center  
217 of the country was not consistent with the direction of key waterways in the country, which

218 primarily run from the eastern highlands to the western shores, suggesting population density  
219 and human-to-human contact likely played a larger role than water sources in this outbreak.

220 Finally, our simulation model provides a proof-of-concept test of the hypothesis of the  
221 impact of the incubation period on disease spread and makes several simplifying assumptions.  
222 These assumptions could be relaxed in future work, including the complete overlap of  
223 symptoms and infectiousness and constant diffusion of agents without increased probability of  
224 returning “home.” Other models for connectivity and movement could also be explored.

225 The threat of cholera and Ebola re-emergence in Sierra Leone remains a concern (28).  
226 We have shown that differences in incubation period alone are a powerful driver of geographic  
227 dispersion and merit further study. Although this study only examines one epidemic from each  
228 disease, the size of these epidemics, combined with simulation results from our model, can  
229 lend information towards a better understanding of each disease and our ability to predict  
230 disease spread. This work can inform development of international preparedness and response  
231 strategies and ensure timely and effective interventions.

232

## 233 **Methods**

234

### 235 Data

236 Cholera cases were reported to the Sierra Leone Ministry of Health and Sanitation by  
237 treatment facilities throughout Sierra Leone between January 1, 2012 and May 15, 2013.  
238 Following standard WHO definitions (29), a suspected cholera case was defined as acute onset  
239 of watery diarrhea or severe dehydration in a person aged five years or older in a region

240 without a known cholera outbreak; once the Government of Sierra Leone declared an outbreak  
241 of cholera on February 27, 2012, any case of acute watery diarrhea could henceforth be  
242 included as a suspected cholera case. Data were compiled and anonymized by the WHO for  
243 analysis, with case reports temporally resolved by day and spatially resolved by chiefdom. For  
244 Ebola, we used a published dataset of 8,358 confirmed and 3,545 suspected Ebola cases  
245 reported to the Sierra Leone Ministry of Health and Sanitation from May 2014 to September  
246 2015 (30). Our analysis included both suspected and confirmed cases of Ebola according to  
247 standard WHO definitions (31). Population estimates for 2012 and 2014 were imputed by  
248 chiefdom using a linear fit between chiefdom population estimates from the 2004 and 2015  
249 Population and Housing Censuses (32).

250 Sierra Leone has four administrative regions, which are divided into fourteen districts.  
251 Freetown, the capital and largest city, is comprised of two districts; the remaining twelve  
252 districts are subdivided into 149 chiefdoms, with a median of 11.5 chiefdoms per district.  
253 Chiefdom, as the finest administrative unit available for cases of both cholera and Ebola, was  
254 considered the unit of observation and the unit of analysis (with the exception of cases in  
255 Freetown which were solely reported at district level), as it is the likely scale of intervention  
256 campaigns like vaccination. To understand what would have been observed at a coarser spatial  
257 scale that is more common for surveillance, we additionally aggregated cases by district.

258

### 259 *Spatiotemporal analysis*

260 We defined the first outbreak week for each chiefdom as the week of the first reported  
261 case in that chiefdom. We visualized outbreak spread using a contour map of outbreak wave

262 front direction and speed (30). Contours of spatial spread were generated using ArcMap 10.3.1  
263 Spatial Analyst extension by applying a fourth degree polynomial trend interpolation of  
264 chiefdom onset dates and generating contour lines of this surface in 2–4 week increments.  
265 With this method, more closely-spaced contour lines indicate slower propagation, similar to the  
266 slope of a topographic map of geographic elevation.

267 To identify space-time clusters, using the SaTScan software package (33), we ran a  
268 retrospective discrete Poisson-based Scan Statistic over the entirety of the outbreaks for which  
269 data were available, namely 16 months of cholera data and 17 months of Ebola data. Disease  
270 case reports were assumed to be Poisson-distributed given chiefdom population size. The unit  
271 of time aggregation for the analysis was specified as the median incubation periods for each  
272 disease (1.5 days for cholera and 10 days for Ebola).

273 We calculated spline correlograms for four chiefdom outbreak metrics to measure  
274 spatial correlation of date of first case, case count, attack rate, and disease presence (yes/no).  
275 The maximum centroid-to-centroid distance was set to 150 km, approximately the radius of  
276 Sierra Leone. We used the spline.correlog function of the R package *ncf* for each disease and all  
277 chiefdom pairs (34).

278 We estimated the daily effective reproductive number ( $R_t$ ), the average number of  
279 onward infections generated by cases with onset on day  $t$ , using methods described by  
280 Wallinga and Teunis and extended to metapopulations by White *et al.* (35, 36). This maximum  
281 likelihood method estimates the probability that an observed case was the infector for each  
282 subsequent case by leveraging information on the daily case count, the serial interval  
283 distribution (i.e., the time between symptom onset of an infector-infectee pair), and a weights

284 matrix that quantifies relative contact frequency within and between chiefdoms. The serial  
285 interval for cholera was assumed to follow a gamma distribution (rate = 0.1, shape = 0.5) with a  
286 median of five days, as has been used previously after consideration of both fast, person-to-  
287 person, and slow, environmental, transmission routes (37, 38). The serial interval for Ebola was  
288 assumed to follow a gamma distribution (rate = 0.17, shape = 2.59) with a median of 13.3 days  
289 derived from the estimates by the WHO Ebola Response Team (1). The contact frequency  
290 between two given chiefdoms was assumed to decrease with squared distance between the  
291 chiefdom centroids. Additional weights matrices with different functional forms for distance  
292 decay yielded qualitatively similar measurements of  $R_t$ .

293

#### 294 Model

295 We simulated an agent-based model with 45,000 agents distributed equally in 150  
296 locations, evenly spaced on a 15 x 10 lattice. Infected agents progressed through a traditional  
297 Susceptible-Exposed-Infectious-Recovered (SEIR) compartmental transmission framework. We  
298 assumed the incubation period (i.e. the time from exposure to symptom onset) overlapped  
299 completely with the latent period (i.e. the time from exposure to onset of infectiousness).  
300 Similarly, the duration of illnesses (5 days) aligned with the duration of infectiousness.  
301 Movement of agents between two locations was based on a gravity model, whereby  
302 connectivity was proportional to the population sizes of each location and the inverse squared  
303 distance between them (39). Different parametrizations of the gravity model, as well as  
304 simulations with relative population size based on Sierra Leone's chiefdom census data (40),  
305 yielded similar results.

306           Susceptible, exposed, and recovered individuals had a daily probability of movement. To  
307 simulate the impact of a reduction in mobility during illness, agents in the model had their  
308 movement reduced as far as zero throughout the course of their period of infectiousness (and,  
309 equivalently, illness). Holding all other parameters constant, we conducted 700 simulations of  
310 epidemics for incubation periods ranging from 1 to 14 days. We seeded the epidemic at the  
311 same location near the center of the lattice for all simulations.

312           Synchrony was assessed with the R package *ncf* functions *mSynch* and *Correlog.Nc* (34),  
313 which both estimate the correlation between the time series in each of the 150 locations across  
314 the 500 days of the simulations, with the latter incorporating distance (34). which both  
315 estimate the correlation between the time series in each of the 150 locations across the 500  
316 days of the simulations, with the latter incorporating distance. To assess the impact of the  
317 incubation period on the initial speed of spread, we calculated the average start time across all  
318 locations in the first 50 days of the outbreaks as well as at increasing distances from the  
319 location on the lattice where the outbreaks began.

320           To estimate the predictability of outbreak spread in space and time, we adapted an  
321 overlap function used to measure predictability of a SARS outbreak (7). In each simulation, a  
322 vector  $\pi_j(t)$  represents the proportion of all infected individuals at time (t) who are at location  
323 (j). In a system with high predictability,  $\pi_j(t)$  will be similar across simulations. The overlap  
324 between simulations I and II can be estimated by:  $\Theta(t) = \sum_j \sqrt{\pi_j^I(t) * \pi_j^{II}(t)}$ .  $\Theta(t)$  ranges from 0  
325 to 1 with a higher value indicating more overlap and thus more predictability. We estimated  
326 predictability at each time point by calculating the average of the overlap functions for each  
327 pair of simulations for each incubation period. We calculated the average overlap across time



328 points to provide a summary metric for predictability of each incubation period. Code and data  
329 are available on Github (41).

330

331 **Acknowledgements**

332 The authors thank Dr. Foday Dafaie for early support of this work.

333 This work was supported by award number U54GM088558 from the National Institute of

334 General Medical Sciences. The content is solely the responsibility of the authors and does not

335 necessarily represent the official views of the National Institutes of Health.

336

337 References

- 338 1. WHO Ebola Response Team (2014) West African Ebola Epidemic after One Year —  
339 Slowing but Not Yet under Control. *N Engl J Med* 372(6):584–587.
- 340 2. CDC (2017) Zika Virus - Transmission and Risks. Available at:  
341 <https://www.cdc.gov/zika/transmission/index.html>.
- 342 3. Gates B (2015) The Next Epidemic — Lessons from Ebola. *N Engl J Med* 372(15):1381–  
343 1384.
- 344 4. Scarpino S V, Petri G (2019) On the predictability of infectious disease outbreaks. *Nat*  
345 *Commun* 10(1):898.
- 346 5. Kraemer MUG, et al. Reconstruction and prediction of viral disease epidemics. *Epidemiol*  
347 *Infect*:1–7.
- 348 6. Meyers LA, Pourbohloul B, Newman MEJ, Skowronski DM, Brunham RC (2005) Network  
349 theory and SARS: Predicting outbreak diversity. *J Theor Biol* 232(1):71–81.
- 350 7. Colizza V, Barrat A, Barthélemy M, Vespignani A (2007) Predictability and epidemic  
351 pathways in global outbreaks of infectious diseases: the SARS case study. *BMC Med*  
352 5(1):34.
- 353 8. Fraser C, Riley S, Anderson RM, Ferguson NM (2004) Factors that make an infectious  
354 disease outbreak controllable. *Proc Natl Acad Sci* 101(16):6146–6151.
- 355 9. Peak CM, Childs LM, Grad YH, Buckee CO (2017) Comparing nonpharmaceutical  
356 interventions for containing emerging epidemics. *Proc Natl Acad Sci* 114(15):4023 LP –  
357 4028.
- 358 10. Haw DJ, et al. (2019) Differential mobility and local variation in infection attack rate.

- 359 *PLOS Comput Biol* 15(1):e1006600.
- 360 11. Nalin DR, Hirschhorn N (2015) Ebola and Cholera. *Am J Trop Med Hyg* 92(5):1081.
- 361 12. Lamontagne F, et al. (2017) Evidence-based guidelines for supportive care of patients  
362 with Ebola virus disease. *Lancet* 6736(17). doi:10.1016/S0140-6736(17)31795-6.
- 363 13. Althaus CL (2014) Estimating the Reproduction Number of Ebola Virus ( EBOV ) During  
364 the 2014 Outbreak in West Africa. *Public Libr Sci Curr Outbreaks*:1–9.
- 365 14. Mukandavire Z, Morris JG (2015) Modeling the Epidemiology of Cholera to Prevent  
366 Disease Transmission in Developing Countries. *Microbiol Spectr*  
367 3(3):10.1128/microbiolspec.VE-0011–2014.
- 368 15. WHO (2019) Ebola virus disease. Available at: [https://www.who.int/news-room/fact-](https://www.who.int/news-room/fact-sheets/detail/ebola-virus-disease)  
369 [sheets/detail/ebola-virus-disease](https://www.who.int/news-room/fact-sheets/detail/ebola-virus-disease).
- 370 16. WHO (2011) Cholera: mechanism for control and prevention. Available at:  
371 [https://www.who.int/cholera/technical/secretariat\\_report/en/](https://www.who.int/cholera/technical/secretariat_report/en/).
- 372 17. WHO (2019) *Cholera Fact Sheet* Available at: [https://www.who.int/news-room/fact-](https://www.who.int/news-room/fact-sheets/detail/cholera)  
373 [sheets/detail/cholera](https://www.who.int/news-room/fact-sheets/detail/cholera).
- 374 18. Victory KR, et al. (2015) Ebola transmission linked to a single traditional funeral  
375 ceremony - Kissidougou, Guinea, December, 2014-January 2015. *MMWR Morb Mortal*  
376 *Wkly Rep* 64(14):386–388.
- 377 19. CDC (2016) Global Water, Sanitation, & Hygiene (WASH). Available at:  
378 [https://www.cdc.gov/healthywater/global/wash\\_statistics.html](https://www.cdc.gov/healthywater/global/wash_statistics.html).
- 379 20. Azman AS, Rudolph KE, Cummings DAT, Lessler J (2013) The incubation period of cholera:  
380 A systematic review. *J Infect* 66(5):432–438.

- 381 21. Marvel SA, Martin T, Doering CR, Lusseau D, Newman MEJ (2013) The small-world effect  
382 is a modern phenomenon. *arXiv Prepr arXiv13102636*.
- 383 22. Finger F, et al. (2018) The potential impact of case-area targeted interventions in  
384 response to cholera outbreaks: A modeling study. *PLOS Med* 15(2):e1002509.
- 385 23. Azman AS, et al. (2016) Effectiveness of one dose of oral cholera vaccine in response to  
386 an outbreak: a case-cohort study. *Lancet Glob Heal* 4(11):e856–e863.
- 387 24. Henao-Restrepo AM, et al. (2017) Efficacy and effectiveness of an rVSV-vectored vaccine  
388 in preventing Ebola virus disease: final results from the Guinea ring vaccination, open-  
389 label, cluster-randomised trial (Ebola Ça Suffit!). *Lancet* 389(10068):505–518.
- 390 25. Glynn JR, et al. (2018) Asymptomatic infection and unrecognised Ebola virus disease in  
391 Ebola-affected households in Sierra Leone: a cross-sectional study using a new non-  
392 invasive assay for antibodies to Ebola virus. *Lancet Infect Dis* 17(6):645–653.
- 393 26. Nelson EJ, Harris JB, Morris JG, Calderwood SB, Camilli A (2009) Cholera transmission: the  
394 host, pathogen and bacteriophage dynamic. *Nat Rev Microbiol*  
395 7(10):10.1038/nrmicro2204.
- 396 27. Weil AA, et al. (2009) Clinical Outcomes in Household Contacts of Patients with Cholera  
397 in Bangladesh. *Clin Infect Dis* 49(10):1473–1479.
- 398 28. WHO (2017) Sierra Leone to begin cholera vaccination drive in disaster-affected areas.
- 399 29. Global Task Force on Cholera Control Prevention and control of cholera outbreaks: WHO  
400 policy and recommendations. *WHO*.
- 401 30. Fang L-Q, et al. (2016) Transmission dynamics of Ebola virus disease and intervention  
402 effectiveness in Sierra Leone. *Proc Natl Acad Sci* 113(16):4488–4493.

- 403 31. World Health Organization (2014) Case definition recommendations for Ebola or  
404 Marburg virus diseases.
- 405 32. Statistics Sierra Leone Statistics Sierra Leone Publications. Available at:  
406 <https://www.statistics.sl/index.php/census.html>.
- 407 33. Kulldorff M, Inc IMS (2006) SaTScan (TM) v7. 0: Software for the spatial and space-time  
408 scan statistics. *Inf Manag Serv Inc*) Available <http://satscan.org> [Verified 5 Oct 2009].
- 409 34. Bjørnstad ON, Ims RA, Lambin X (1999) Spatial population dynamics: Analyzing patterns  
410 and processes of population synchrony. *Trends Ecol Evol* 14(11):427–432.
- 411 35. Wallinga J, Teunis P (2004) Different epidemic curves for severe acute respiratory  
412 syndrome reveal similar impacts of control measures. *Am J Epidemiol* 160(6):509–516.
- 413 36. White LF, Archer B, Pagano M (2013) Estimating the reproductive number in the  
414 presence of spatial heterogeneity of transmission patterns. *Int J Health Geogr*:35.
- 415 37. Azman AS, et al. (2016) Population-level effect of cholera vaccine on displaced  
416 populations, South Sudan, 2014. *Emerg Infect Dis* 22(6):1067–1070.
- 417 38. Azman AS, et al. (2012) Urban Cholera Transmission Hotspots and Their Implications for  
418 Reactive Vaccination: Evidence from Bissau City, Guinea Bissau. *PLoS Negl Trop Dis* 6(11).  
419 doi:10.1371/journal.pntd.0001901.
- 420 39. Dudas G, et al. (2017) Virus genomes reveal factors that spread and sustained the Ebola  
421 epidemic. *Nature* 544(7650):309–315.
- 422 40. Statistics Sierra Leone (2016) *2015 Population and Housing Census* Available at:  
423 [https://www.statistics.sl/images/StatisticsSL/Documents/final-results\\_-](https://www.statistics.sl/images/StatisticsSL/Documents/final-results_-2015_population_and_housing_census.pdf)  
424 [2015\\_population\\_and\\_housing\\_census.pdf](https://www.statistics.sl/images/StatisticsSL/Documents/final-results_-2015_population_and_housing_census.pdf).

425 41. Kahn R Sierra Leone Cholera & Ebola. Available at: [https://github.com/rek160/Sierra-](https://github.com/rek160/Sierra-Leone-Cholera-Ebola)  
426 Leone-Cholera-Ebola.

427

#### 428 **Figure legends**

429 Figure 1. The proportion of cholera and Ebola cases reported over time differed between  
430 district and chiefdom level. The times between the onset of an outbreak and when half or all of  
431 its cases were reported were longer when outbreaks were aggregated by district instead of  
432 chiefdom, which has implications for the optimal scale for surveillance and response measures.  
433 The median time for a chiefdom cholera outbreak to report half its case total was 3.9 weeks  
434 and a median of 7.9 weeks for district cholera outbreaks. For Ebola, chiefdoms reported half of  
435 their cases at a median of 13.9 weeks and districts at a median of 23.5 weeks.

436

437 Figure 2. Spatial trend contours of disease spread and chiefdom attack rates highlight  
438 similarities and differences between the two epidemics. Spatial trend contours of cholera (A)  
439 and Ebola (B) spread from areas in dark red to light red; thicker lines (A & B) show monthly  
440 increments and thinner lines (B) show 2 week increments. Thick black lines denote regions and  
441 thin black lines denote districts. Chiefdom attack rate quartile for cholera (C) and Ebola (D) vary  
442 over space and regions. Colored boundaries denote regions, followed by bold black borders for  
443 districts and thin borders for chiefdoms.

444

445 Figure 3. Weekly case counts show outbreak trajectory in the four regions of the country. The  
446 bars in A and B indicate the weekly case count on independent y-axes of cholera and Ebola,

447 respectively. Black lines show maximum likelihood estimates of  $R_t$  of cholera and Ebola  
448 epidemics nationally (A and B, respectively) and in each region (C and D, respectively).

449  
450 Figure 4. Results of 700 simulations of 14 different incubation periods show the impact of  
451 incubation period on disease spread. Epidemics with shorter incubation periods are more acute  
452 than epidemics with longer incubation periods (A). The average start time of epidemics at all  
453 locations over the first 50 days of outbreak is later for shorter incubation periods than longer  
454 (B). Spatial trend contours of first 50 days of simulated outbreaks with shorter incubation  
455 period (2 days) (C) and longer incubation period (10 days) (D), spreading from areas in dark red  
456 to light red, show that shorter incubation periods result in a more wave front spread and longer  
457 incubation periods result in more long-distance sparking events; numbers show average start  
458 day relative to start of the outbreak.

459  
460 Figure 5. The incubation period impacts the timing of outbreaks and as a result, the correlation.  
461 As the incubation period increases, the proportion of cases reported by 10 weeks, when a  
462 reactive vaccination campaign might begin, decreases in simulated epidemics (A). As the  
463 incubation period increases, the average correlation overall (B) and by distance from origin of  
464 simulated outbreaks (C) decreases.

465  
466 Figure 6. The incubation period impacts the predictability of disease spread. As the incubation  
467 period increases, the average overlap (predictability) of the first 50 days (A) and over the first  
468 50 days (B) of simulated outbreaks decreases.

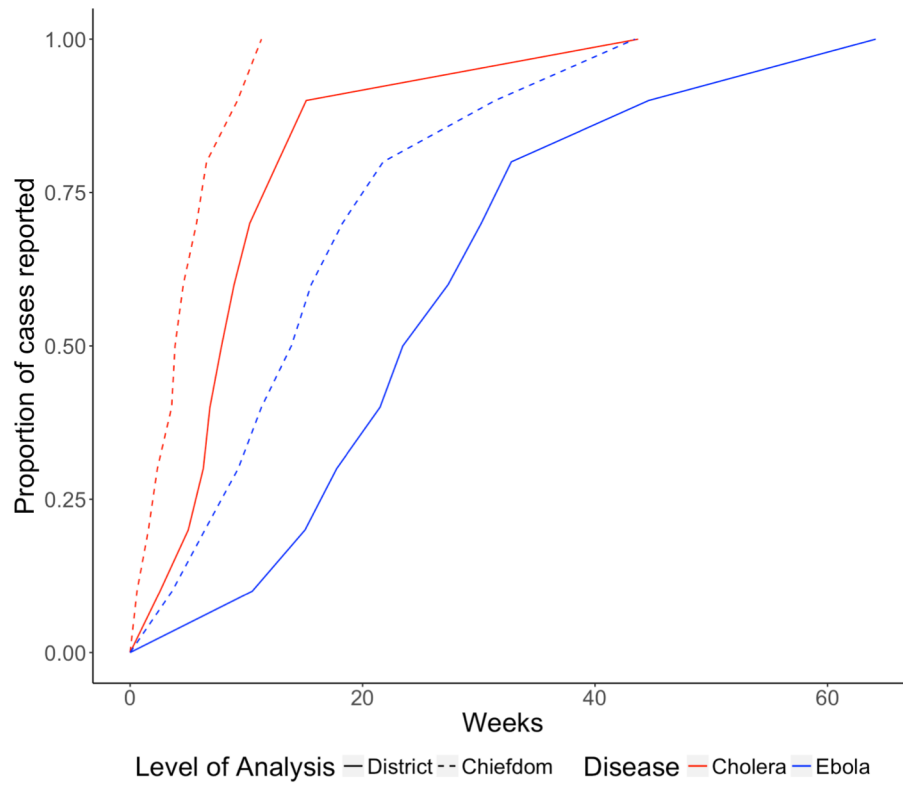

Figure 1

469



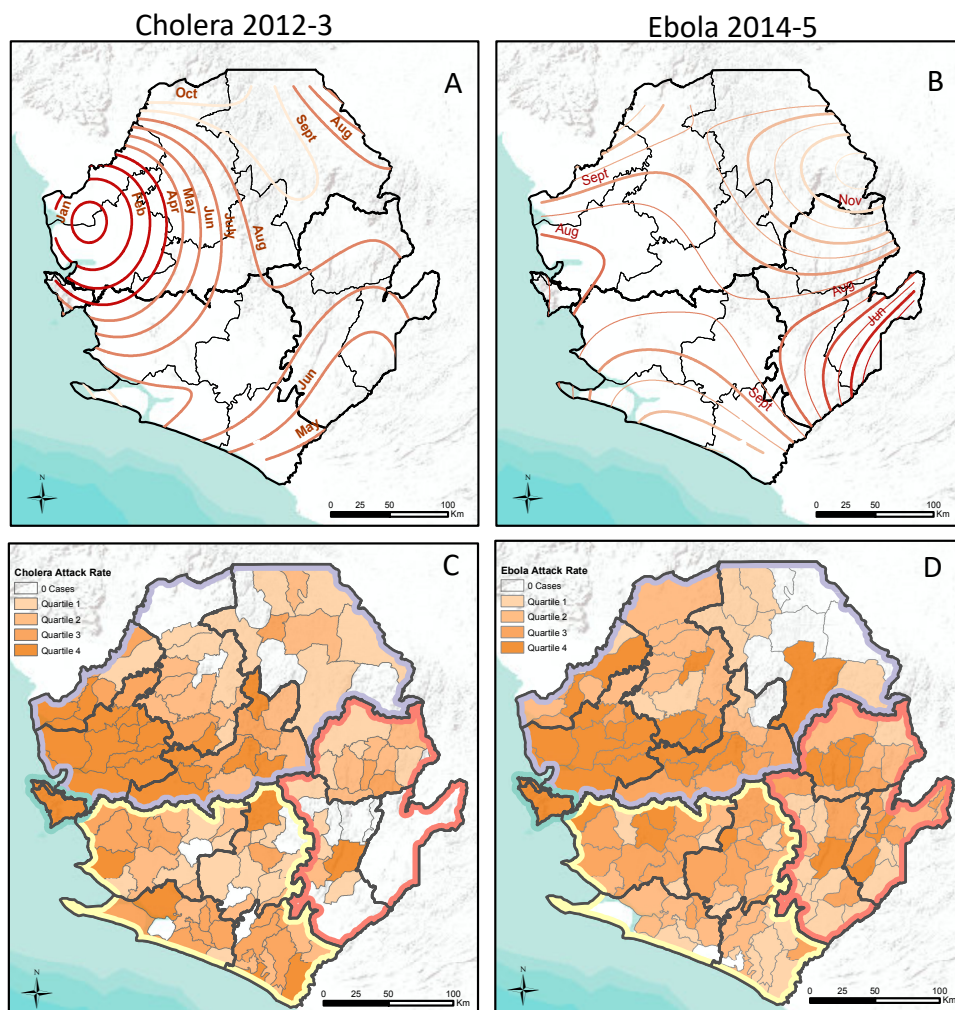

Figure 2

470

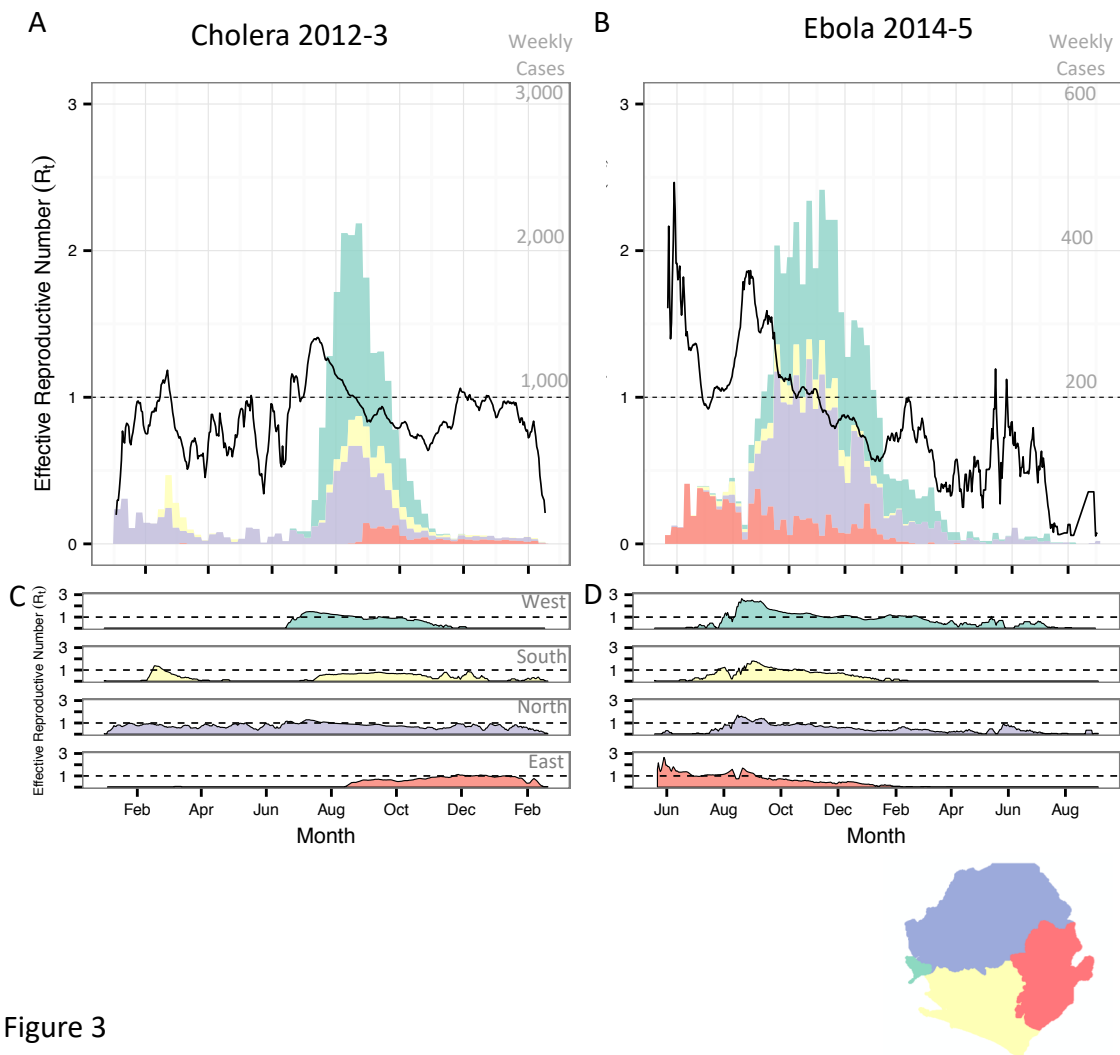

Figure 3

471

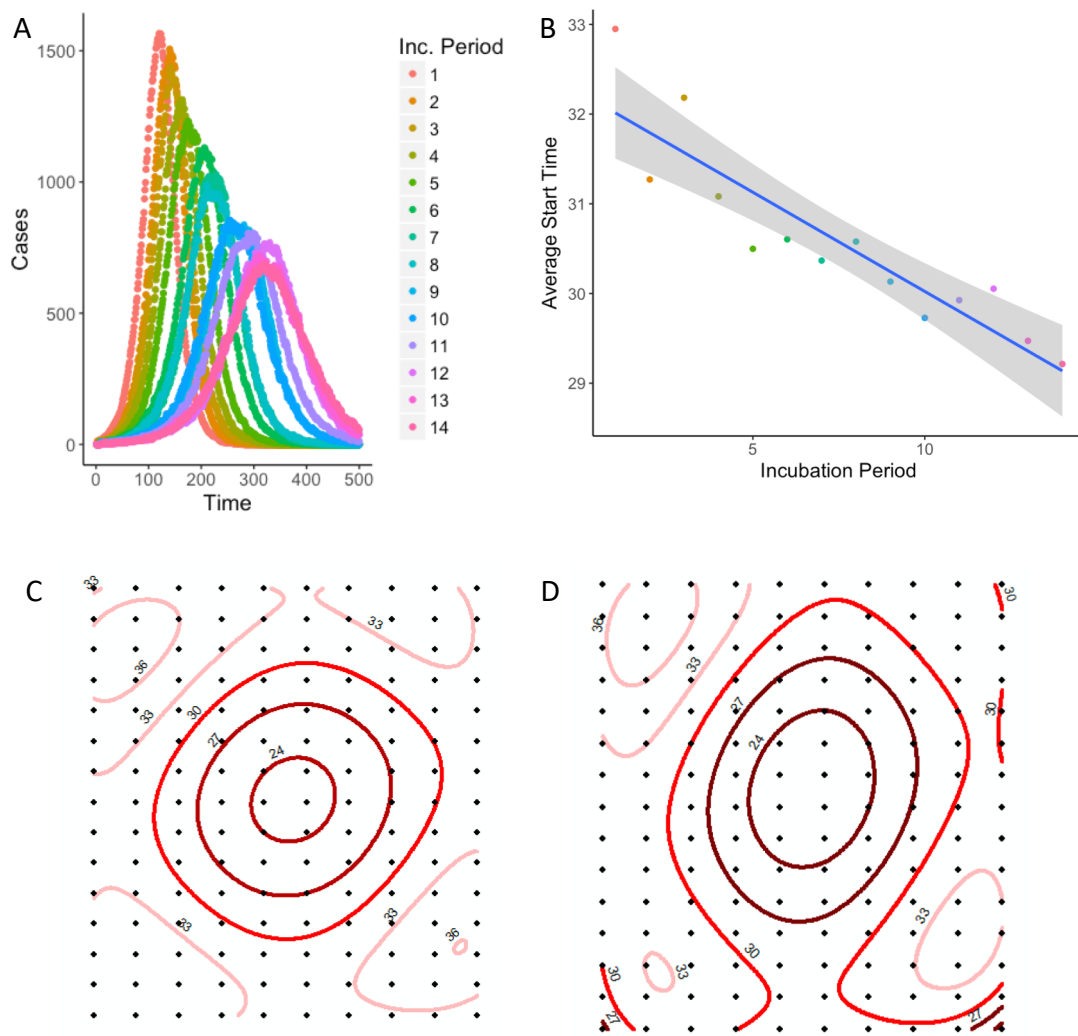

Figure 4

472

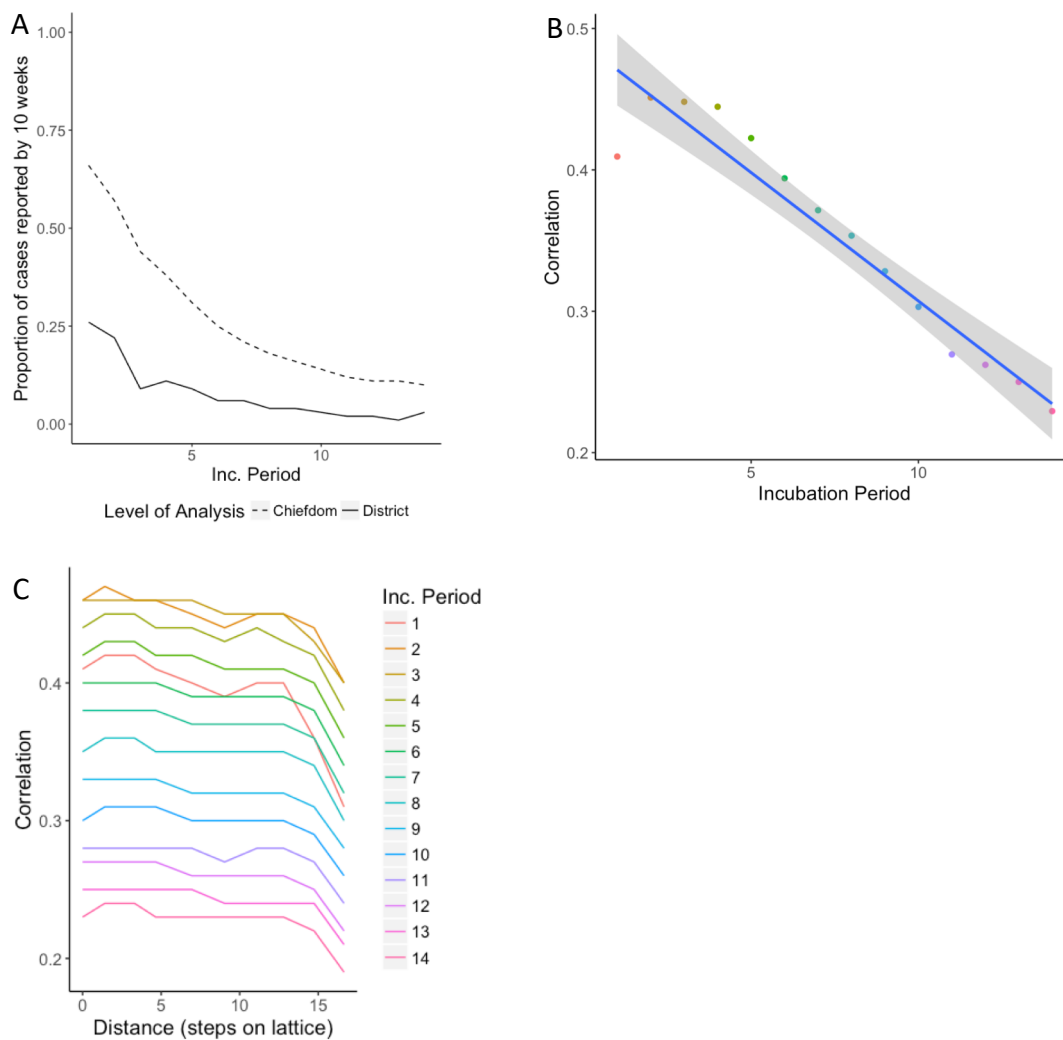

Figure 5

473

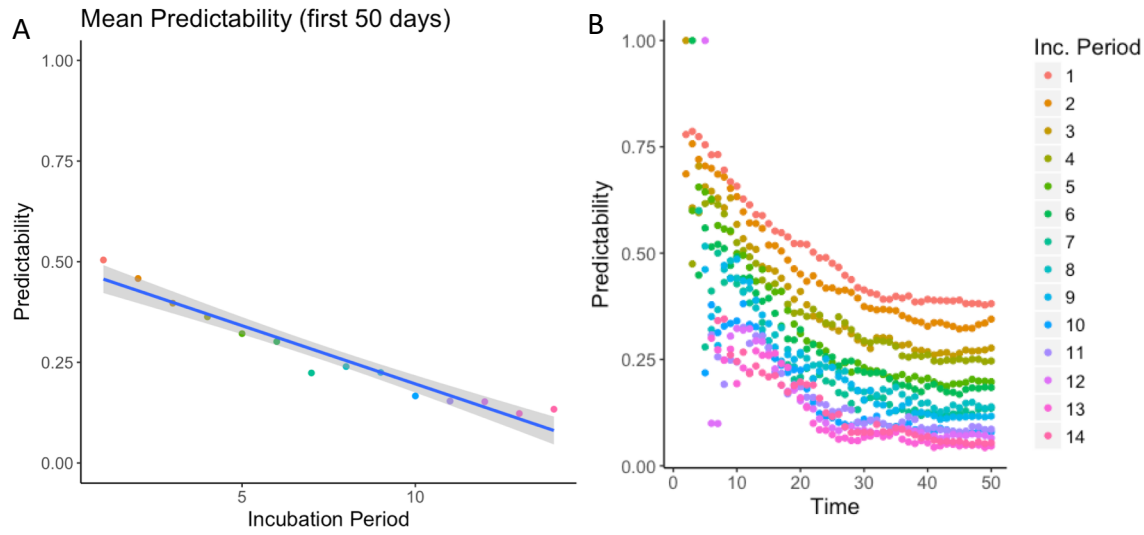

Figure 6

474
